# Supplementary material for: Optimization and Application of Reflective LSPR Optical Fiber Biosensors Based on Silver Nanoparticles
Source: MDPI journal article supplement (doi:10.3390/s150612205), 2015-05-26
Supplement: s1 [file s1]

## **Optimization and Application of Reflective LSPR Optical Fiber Biosensors Based on Silver Nanoparticles. *Sensors* 2015, 15, 12205-12217**

**Jiangping Chen <sup>1</sup>, Se Shi <sup>1</sup>, Rongxin Su <sup>1,2,\*</sup>, Wei Qi <sup>1,2,\*</sup>, Renliang Huang <sup>3</sup>, Mengfan Wang <sup>1</sup>, Libing Wang <sup>1</sup> and Zhimin He <sup>1</sup>**

<sup>1</sup> State Key Laboratory of Chemical Engineering, Tianjin Key Laboratory of Membrane Science and Desalination Technology, School of Chemical Engineering and Technology, Tianjin University, Tianjin 300072, China; E-Mails: cjpjm@126.com (J.C.); shise@tju.edu.cn (S.S.); mwang@tju.edu.cn (M.W.); wanglb1@163.com (L.W.); enzyme@tju.edu.cn (Z.H.)

<sup>2</sup> Collaborative Innovation Center of Chemical Science and Engineering (Tianjin), Tianjin 300072, China

<sup>3</sup> School of Environmental Science and Engineering, Tianjin University, Tianjin 300072, China; E-Mail: tjuhl@tju.edu.cn

\* Authors to whom correspondence should be addressed; E-Mails: surx@tju.edu.cn (R.S.); qiwei@tju.edu.cn (W.Q.); Tel./Fax: +86-022-2740-7599 (R.S.).

---

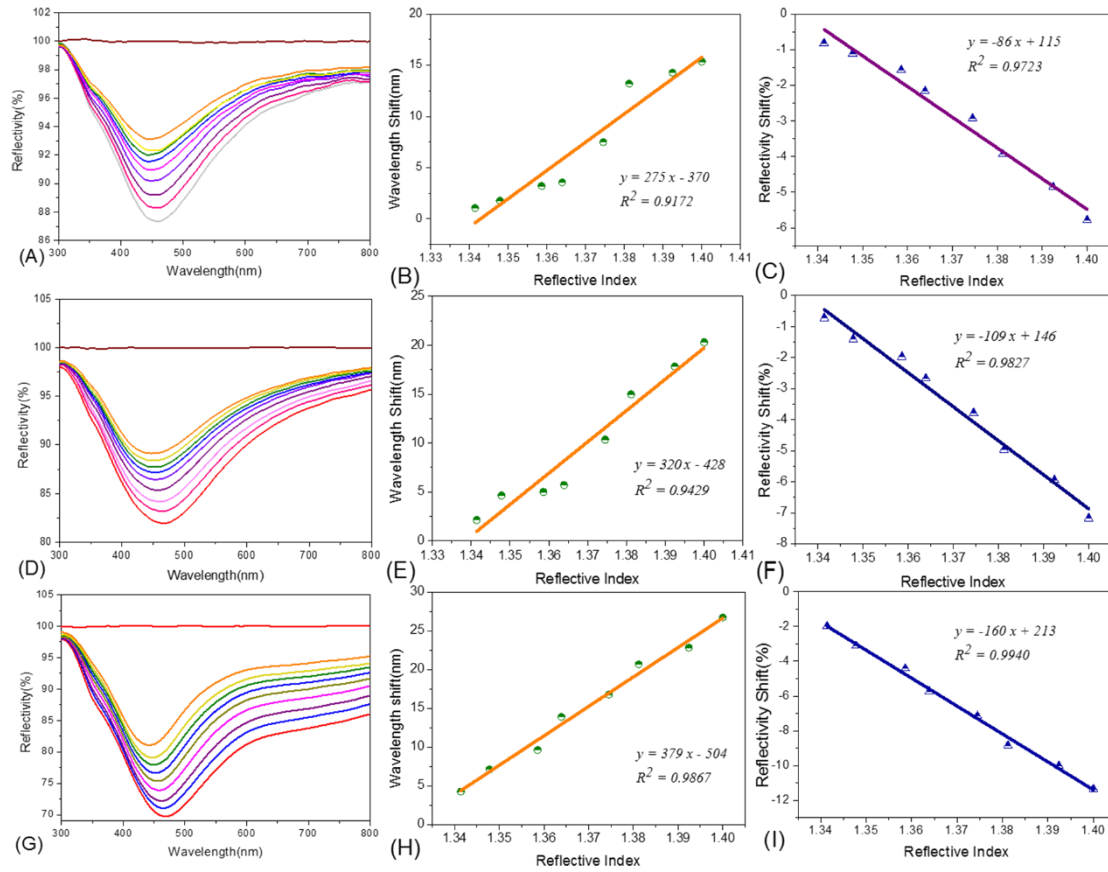

**Figure S1.** Refractive index sensitivities of the AgNPs-based sensors with different sensing length of 0.5 cm, 1 cm, 1.5 cm. (A,D,G) illustrate the reflective spectrum of the AgNP-based sensors with different refractive index solutions; (B,E,H) illustrates the wavelength shift comparison of the AgNP-based sensors with three different sensing lengths; (C,F,I) illustrates the optical intensity shift comparison of the AgNP-based sensors with three different sensing lengths.

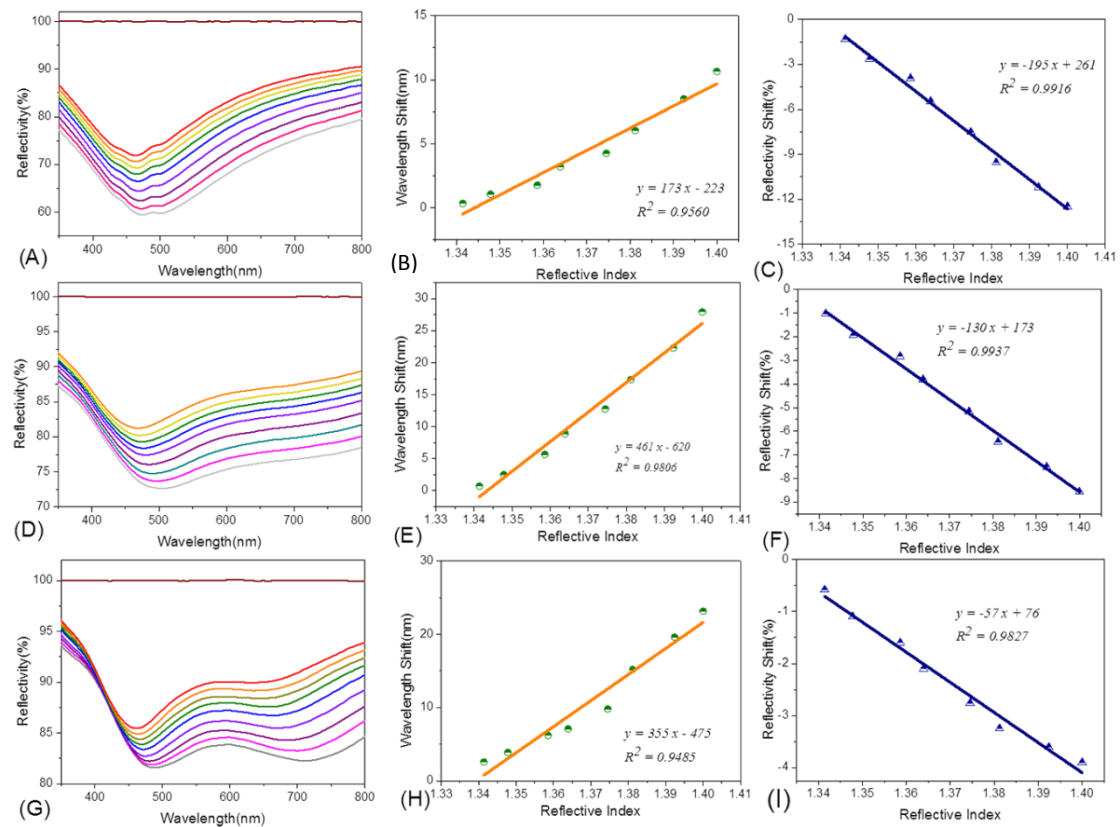

**Figure S2.** Refractive index sensitivities of the AgNP-based sensors with different coating time of 0.5 h, 1 h, 3 h. (A,D,G) illustrate the reflective spectrum of the AgNP-based sensors with different refractive index solutions; (B,E,H) illustrates the wavelength shift comparison of the AgNP-based sensors with three different coating time; (C,F,I) illustrates the optical intensity shift comparison of the AgNP-based sensors with three different coating time.
